# Supplementary material for: Incremental impact upon malaria transmission of supplementing pyrethroid-impregnated long-lasting insecticidal nets with indoor residual spraying using pyrethroids or the organophosphate, pirimiphos methyl
Source: Springer Nature journal article supplement (doi:10.1186/s12936-016-1143-7), 2016-02-18
Supplement: MOESM1 [file 9762158]

**Additional file:**

**IRS coverage, LLIN utilization and Diagnostic Positivity 1 to 6 months post IRS implementation by cluster.**

| <b>Period</b>                             | <b>Cluster</b> | <b>IRS Status</b>       | <b>IRS Coverage %<br/>(n/N)</b> | <b>LLINs use % (n/N)</b> | <b>Diagnostic positivity<br/>% (n/N)</b> |
|-------------------------------------------|----------------|-------------------------|---------------------------------|--------------------------|------------------------------------------|
| <b>October 2010<br/>to March<br/>2011</b> | 1              | None                    | 0.0 (0/1577)                    | 65.1 (1025/1575)         | 24.7 (372/1508)                          |
|                                           | 2              | None                    | 0.0 (0/827)                     | 98.0 (2485/2537)         | 20.9 (559/2676)                          |
|                                           | 3              | None                    | 0.0 (0/2182)                    | 49.0 (1492/3046)         | 26.9 (809/3006)                          |
|                                           | 4              | Deltamethrin WG         | 72.0 (1920/2667)                | 82.3 (2194/2667)         | 33.2 (825/2489)                          |
|                                           | 5              | Deltamethrin WG         | 92.4 (1362/1474)                | 95.8 (1412/1474)         | 27.5 (396/1439)                          |
|                                           | 6              | Deltamethrin WG         | 95.3 (2750/2886)                | 95.4 (2744/2876)         | 11.9 (338/2845)                          |
|                                           | 7              | Deltamethrin WG         | 98.5 (2358/2395)                | 99.7 (2467/2474)         | 6.0 (144/2415)                           |
|                                           | 8              | None                    | 0.0 (0/424)                     | 6.6 (28/426)             | 55.7 (202/363)                           |
|                                           | 9              | None                    | 0.0 (0/7)                       | 36.4 (4/11)              | 36.4 (4/11)                              |
|                                           | 10             | None                    | 0.0 (0/343)                     | 39.7 (136/343)           | 50.7 (172/339)                           |
|                                           | 11             | None                    | 0.0 (0/134)                     | 32.1 (43/134)            | 51.3 (60/117)                            |
|                                           | 12             | None                    | 0.0 (0/49)                      | 79.6 (39/49)             | 61.9 (26/42)                             |
|                                           | 13             | None                    | 0.0 (0/221)                     | 30.8 (68/221)            | 60.0 (120/200)                           |
|                                           | 14             | None                    | 0.0 (0/77)                      | 41.6 (32/77)             | 52.4 (33/63)                             |
| <b>October 2011<br/>to March<br/>2012</b> | 1              | None                    | 0.0 (0/1105)                    | 87.4 (1063/1217)         | 9.5 (95/998)                             |
|                                           | 2              | Pirimiphosmethyl EC     | 10.3 (245/2380)                 | 75.8 (2235/2948)         | 8.5 (280/3292)                           |
|                                           | 3              | None                    | 0.0 (0/2593)                    | 33.1 (1253/3790)         | 10.8 (436/4033)                          |
|                                           | 4              | Pirimiphosmethyl EC     | 57.9 (2194/3788)                | 92.9 (3541/3811)         | 5.9 (217/3708)                           |
|                                           | 5              | Pirimiphosmethyl EC     | 57.6 (1952/3392)                | 97.7 (3388/3469)         | 18.2 (624/3436)                          |
|                                           | 6              | Lambdacyhalothrin<br>CS | 80.7 (1128/1398)                | 80.2 (1139/1421)         | 5.2 (76/1457)                            |
|                                           | 7              | Lambdacyhalothrin<br>CS | 81.8 (2317/2833)                | 99.9 (3107/3109)         | 4.2 (130/3111)                           |
|                                           | 8              | None                    | 0.0 (0/3918)                    | 75.4 (2952/2917)         | 29.9 (974/3261)                          |
|                                           | 9              | Pirimiphosmethyl EC     | 33.5 (541/1613)                 | 51.95 (838/1613)         | 46.6 (684/1467)                          |
|                                           | 10             | None                    | 0.0 (0/1466)                    | 55.4 (812/1466)          | 35.4 (444/1254)                          |
|                                           | 11             | Pirimiphosmethyl EC     | 1.8 (74/4117)                   | 60.1 (2474/4117)         | 30.2 (941/3112)                          |
|                                           | 12             | None                    | 0.0 (0/1546)                    | 59.7 (925/1549)          | 33.9 (514/1517)                          |
|                                           | 13             | Pirimiphosmethyl EC     | 16.8 (407/2422)                 | 45.9 (1111/2422)         | 27 (5.033/1974)                          |
|                                           | 14             | None                    | 0.0 (0/1964)                    | 52.1 (1023/1964)         | 41.3 (786/1904)                          |
| <b>October 2012<br/>to March<br/>2013</b> | 1              | None                    | 0.0 (0/464)                     | 100.0 (464/464)          | 14.4 (150/1039)                          |
|                                           | 2              | None                    | 0.0 (0/1076)                    | 99.8 (1074/1076)         | 11.9 (126/1061)                          |
|                                           | 3              | None                    | 0.0 (0/1915)                    | 99.1 (1897/1915)         | 14.1 (282/2004)                          |
|                                           | 4              | Pirimiphosmethyl EC     | 100 (1170/1170)                 | 100.0 (2632/2632)        | 10.8 (314/2908)                          |
|                                           | 5              | Pirimiphosmethyl EC     | 100 (1387/1387)                 | 99.7 (1725/1730)         | 27.3 (456/1673)                          |
|                                           | 6              | Lambdacyhalothrin       | 100 (348/348)                   | 100.0 (1386/1386)        | 3.8 (57/1505)                            |

|    |                     |                  |                   |                  |
|----|---------------------|------------------|-------------------|------------------|
|    | CS                  |                  |                   |                  |
| 7  | Lambdacyhalothrin   | 88.8 (645/726)   | 100.0 (1123/1123) | 2.99 (33/1105)   |
|    | CS                  |                  |                   |                  |
| 8  | Pirimiphosmethyl CS | 0.7 (18/2439)    | 28.5(696/2439)    | 9.0 (209/2321)   |
| 9  | Pirimiphosmethyl CS | 73.7 (1386/1881) | 48.5 (913/1881)   | 23.5 (366/1561)  |
| 10 | Pirimiphosmethyl CS | 0.7 (10/1379)    | 85.1 (1174/1379)  | 27.1 (363/1341)  |
| 11 | None                | 0.0 (0/3440)     | 16.5 (566/3440)   | 11.9 (300/2531)  |
| 12 | Pirimiphosmethyl CS | 30.3 (346/1143)  | 82.2 (940/1143)   | 21.7 (246/1132)  |
| 13 | None                | 0.0 (0/2433)     | 46.4 (1128/2433)  | 30.6 (666/2180)  |
| 14 | Pirimiphosmethyl CS | 40.4 (574/1421)  | 38.1 (541/1421)   | 16.99 (221/1301) |

---

↓ Indicative start point of IRS treatment

— Sporozoite Prevalence

█ Diagnostic positivity with IRS treatment

▬ Diagnostic positivity without IRS treatment

Chinambi - CS Primiphosmethyl

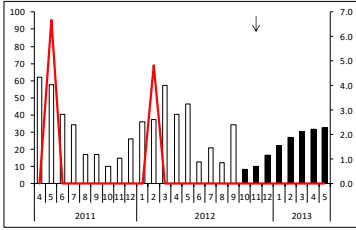

Chipembe – CS Primiphosmethyl

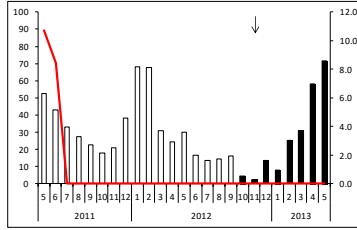

Chitope (not sprayed)

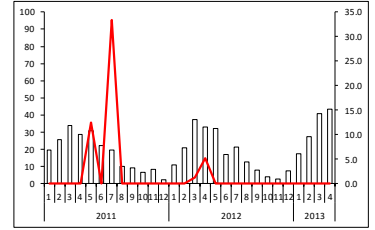

Hofmyer – CS Primiphosmethyl

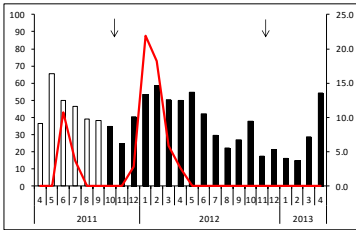

Kacholola – CS Primiphosmethyl

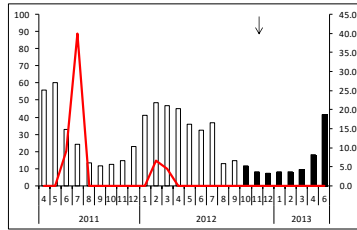

Kasinsa - EC Primiphosmethyl

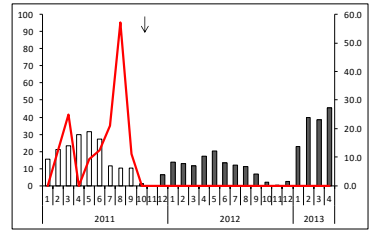

Luangwa Boma - CS lambda-dacyhalothrin both times

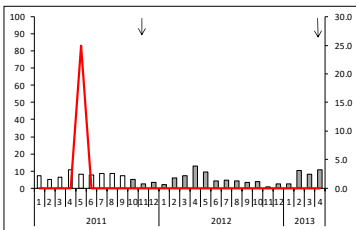

Luangwa Sec School – EC primiphosmethyl both times

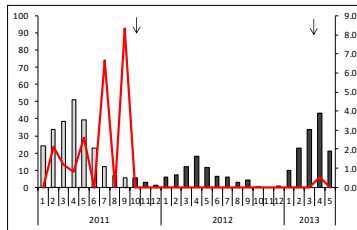

Mandombe – CS lambda-dacyhalothrin both times

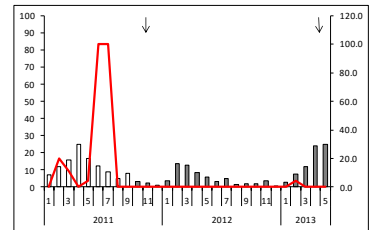

Mkopeka - EC Primiphosmethyl

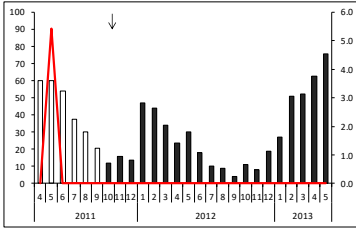

Mphuka – EC Primiphosmethyl both times

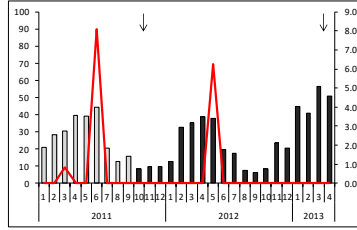

Mtilizi RHC – CS Primiphosmethyl

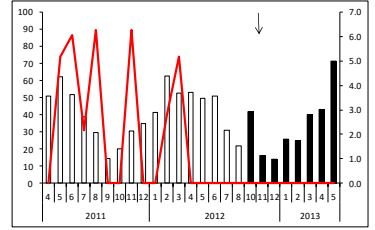

Mtilizi RHP – EC Primiphosmethyl

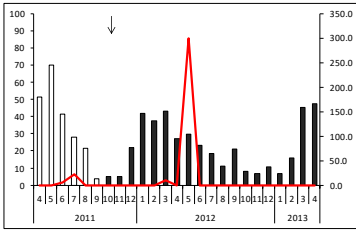

Sinyawogora (not sprayed)

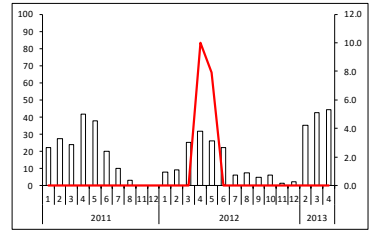

RDT Diagnostic Positivity

Sporozoite Prevalence

Time (Months)
